# Supplementary material for: Quality Control Procedure Based on Partitioning of NMR Time Series
Source: MDPI journal article supplement (doi:10.3390/s18030792), 2018-03-06
Supplement: s1 [file s1]

# Tool for analysis of time series of NMR data

[About project](#)[GUI](#)[Matlab scripts](#)[Download](#)[Contact](#)

---

## Authors

If you use this software you should cite the following in any resulting publication:

[1] Michał Staniszewski, Agnieszka Skorupa, Łukasz Boguszewicz, Maria Sokół and Andrzej Polański. Quality Control Procedure Based on Partitioning of NMR Time Series.

Contact: [Michal.Staniszewski@polsl.pl](mailto:Michal.Staniszewski@polsl.pl)

**Copyright © All Rights Reserved.**
