# Supplementary material for: Quality Control Procedure Based on Partitioning of NMR Time Series
Source: MDPI journal article supplement (doi:10.3390/s18030792), 2018-03-06
Supplement: s1 [file s1]

# Tool for analysis of time series of NMR data

[About project](#)[GUI](#)[Matlab scripts](#)[Download](#)[Contact](#)

---

## Download

**Download GUI with required scripts and function**

---

[GUI](#)

**Download all scripts and demo**

---

[Matlab scripts](#)

**Download full paper**

---

If you use this software you should cite the following in any resulting publication:

[1] Michał Staniszewski, Agnieszka Skorupa, Łukasz Boguszewicz, Maria Sokół and Andrzej Polański. Quality Control Procedure Based on Partitioning of NMR Time Series.

**Copyright © All Rights Reserved.**
